# Supplementary material for: Fecal microbial characterization of hospitalized patients with suspected infectious diarrhea shows significant dysbiosis
Source: PubMed Central journal article supplement (PMC5430810; doi:10.1038/s41598-017-01217-1), 2017-04-24
Supplement: 41598_2017_1217_MOESM1_ESM.pdf [file 41598_2017_1217_MOESM1_ESM.pdf]

## **Supplementary Information**

### **Fecal microbial characterization of hospitalized patients with suspected infectious diarrhea shows significant dysbiosis**

Tzipi Braun\*<sup>1</sup>, Ayelet Di Segni\*<sup>1</sup>, Marina Ben Shoshan<sup>1</sup>, Roy Asaf<sup>1</sup>, James E. Squires<sup>2</sup>, Sarit Farage Barhom<sup>1</sup>, Efrat Glick Saar<sup>1</sup>, Karen Cesarkas<sup>1</sup>, Gill Smollan<sup>1</sup>, Batia Weiss<sup>1,3</sup>, Sharon Amit<sup>1</sup>, Nathan Keller<sup>1,3</sup>, Yael Haberman<sup>1,4</sup>

<sup>1</sup>Sheba Medical Center, Tel-HaShomer, 5265601, Israel

<sup>2</sup>Children's Hospital of Pittsburgh of UPMC, 4401 Penn Ave, Pittsburgh, PA, 15224, USA

<sup>3</sup>Tel Aviv University, Ramat Aviv, Tel-Aviv, 6997801, Israel

<sup>4</sup>Cincinnati Children's Hospital Medical Center, 3333 Burnet Ave, Cincinnati, OH, 45229, USA.

\*equal contribution

#### **Corresponding Author:**

Yael Haberman, MD, PhD

Division of Pediatric Gastroenterology, Hepatology & Nutrition

Cincinnati Children's Hospital Medical Center

MLC 2010, 3333 Burnet Avenue

Cincinnati, OH 45229

Yael.haberman@cchmc.org

### **List of suppl. Figures**

**Figure S1.**  $\alpha$ -diversity decreases in patients with *Clostridium difficile*.

### **List of Suppl. Tables**

**Table S1** (separate Excel file). MaAsLin analysis results for Israeli hospitalized samples stratified by ages 0-<4 years and 18-70 years and microbial abundance.

**Table S2.** Demographic characteristics of the cohorts.

**Table S3** (separate Excel file). MaAsLin analysis results for comparison between cohorts, and microbial abundance.

**Table S4** (separate Excel file). Relative abundance OTU table of Israel hospitalized cohort, isolates and controls.

**Figure S1:  $\alpha$ -diversity decreases in patients with *Clostridium difficile*.**

Phylogenetic diversity of samples from patients diagnosed for *Clostridium difficile* infection (n=8 patients). Negative samples are age-fitted to samples with a positive diagnosis (n=68 patients, aged 39-91 years). Asterisk indicates significant differences (Mann Whitney test: \*  $P < 0.05$ ).

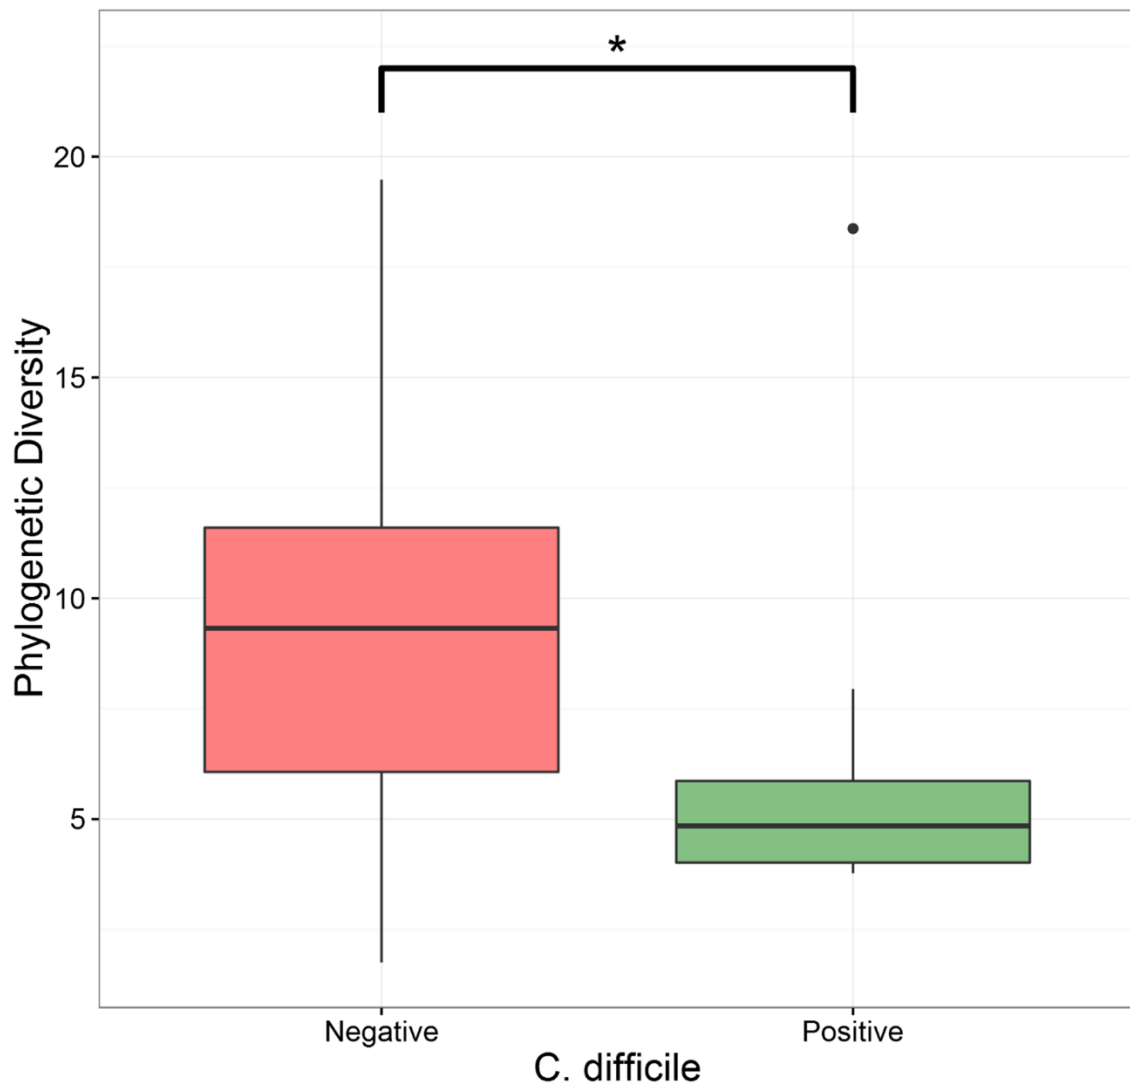

**Table S2:** Demographic characteristics of the cohorts

| <b>Cohort</b>               | <b>No. of participants (n)</b> | <b>Mean(SD) Age(years)</b> | <b>No. of infants and toddlers (&lt;4years) (n)</b> | <b>No. of children (4-&lt;18years) (n)</b> | <b>No. of adults (18-&lt;70years) [n, mean(SD) age(years)]</b> | <b>No. of elders (≥70years) (n)</b> |
|-----------------------------|--------------------------------|----------------------------|-----------------------------------------------------|--------------------------------------------|----------------------------------------------------------------|-------------------------------------|
| <b>Israeli hospitalized</b> | 196                            | 40.8 ± 29.8                | 35                                                  | 16                                         | 97 (43.5± 17.8)                                                | 42                                  |
| <b>Israeli healthy 1</b>    | 873                            | 43.3 ± 13.1                | 0                                                   | 0                                          | 873 (43.3 ± 13.1)                                              | 0                                   |
| <b>Israeli healthy 2</b>    | 8                              | 51 ± 9.7                   | 0                                                   | 0                                          | 8 (51 ± 9.7)                                                   | 0                                   |
